# Supplementary material for: PIP2 depletion and altered endocytosis caused by expression of Alzheimer's disease‐protective variant PLCγ2 R522
Source: PubMed Central journal article supplement (PMC8408593; doi:10.15252/embj.2020105603), 2021-07-13
Supplement: EMBJ-40-e105603-s003.pdf [file EMBJ-40-e105603-s003.pdf]

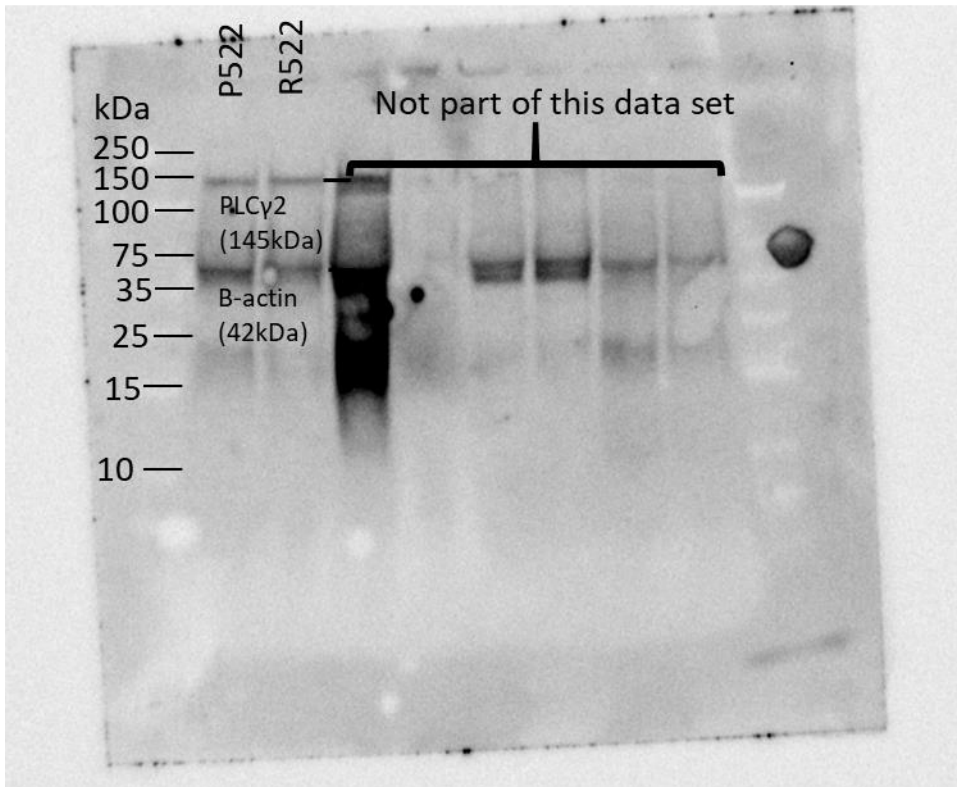

Western blot from Appendix figure S1B

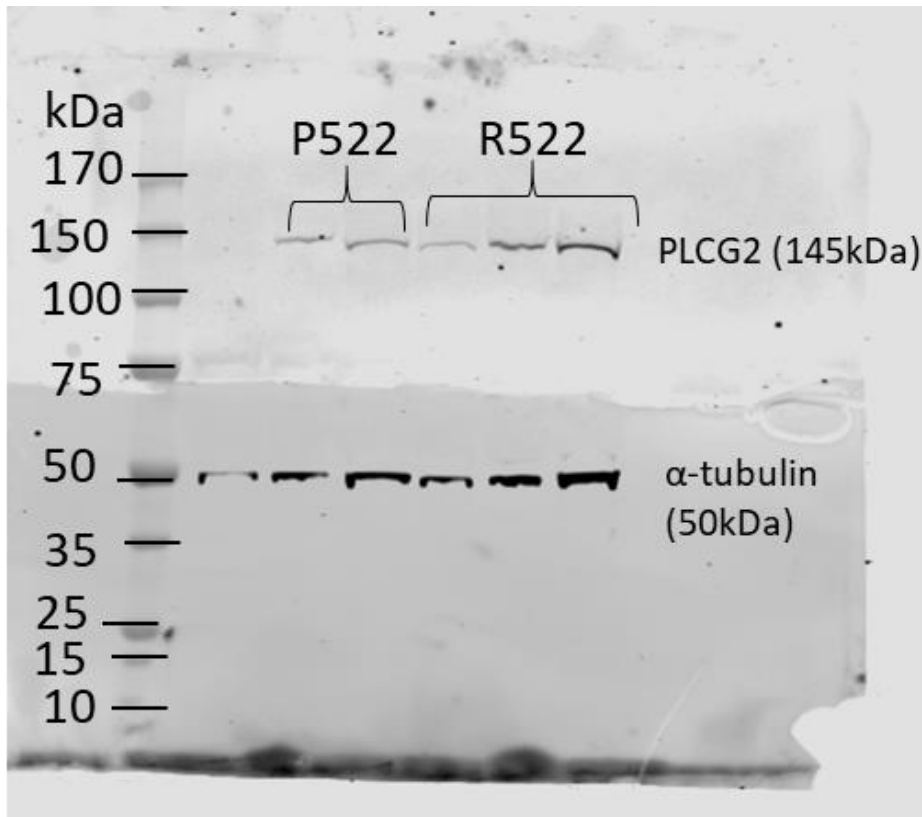

Western blot from Appendix figure S8D
